# Supplementary material for: Evaluation of the Ion Channel Assembly in a Eukaryotic Cell-Free System Focusing on Two-Pore Domain Potassium Channels K2P
Source: MDPI journal article supplement (doi:10.3390/ijms24076299), 2023-03-27
Supplement: s1 [file s1]

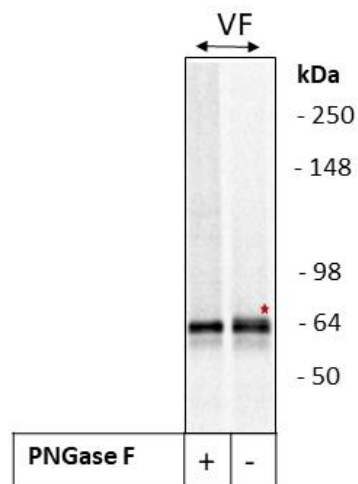

**Figure S1.** Cell-free synthesis of TREK-2. The product of cell-free synthesis (TM) was fractionated by centrifugation in the supernatant (SN) and the vesicular fraction (VF). Autoradiograph of denatured 4-12 % SDS-Gel of TREK-2 treated with the endoglycosidase PNGase F. The non-deglycosylated sample is marked with an asterisk.

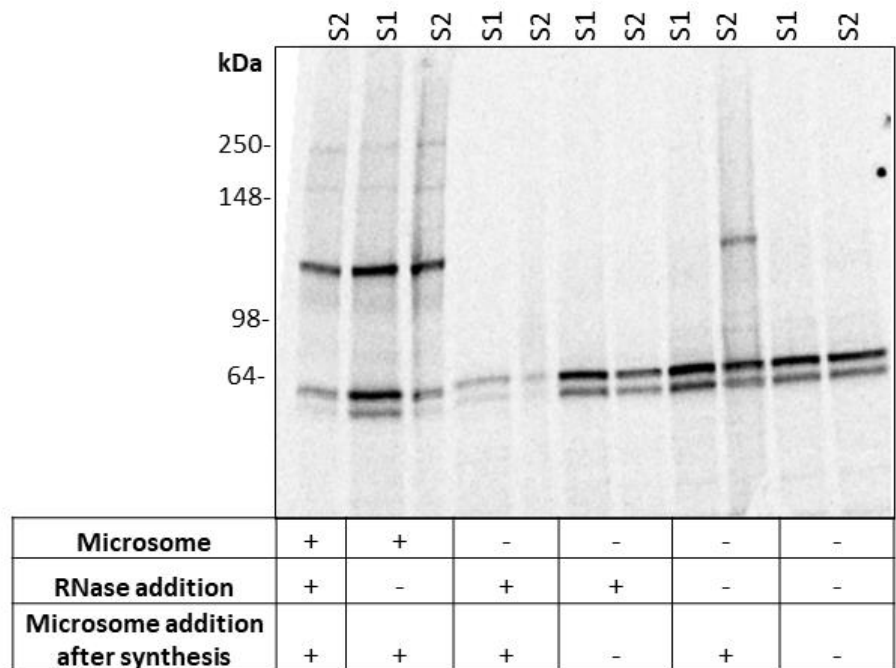

**Figure S2.** CFS was supplemented with  $^{14}\text{C}$ -leucine. Synthesis was performed in microsome-containing or -depleted lysate and sampled according to figure 2, c. Autoradiograph of samples is depicted (compare figure 2,d) as applied. For a better understanding the lanes in figure 2, d were rearranged.

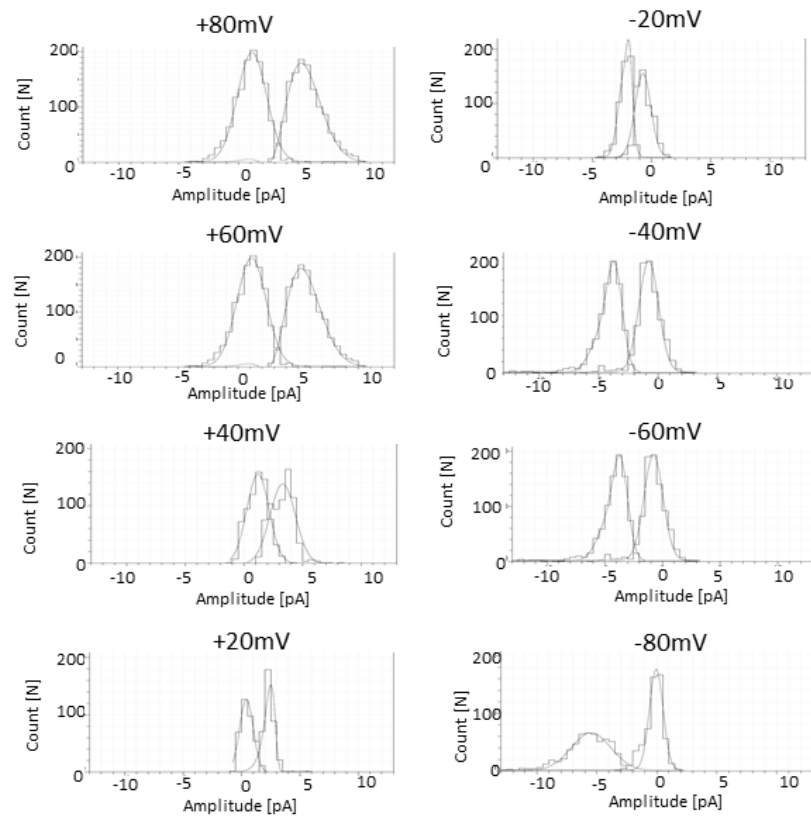

**Figure S3.** Electrophysiological Characterization: Measurements were performed using planar lipid bilayer electrophysiology, DPhPC lipids and 150 mM KCl in 20 mM Hepes buffer. Histograms showing the amplitudes (pA) of the TREK-2 currents against counts of current amplitudes at applied voltages.

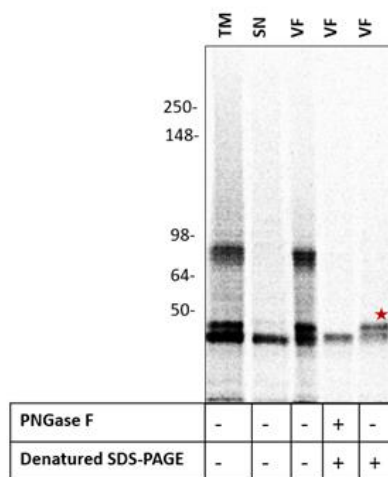

**Figure S4.** Cell-free synthesis of TWIK-1. The product of cell-free synthesis (TM) was fractionated by centrifugation in the supernatant (SN) and the vesicular fraction (VF). Samples were labeled with  $^{14}\text{C}$ -leucine. Autoradiograph of 4-12 % Tris-glycine SDS-Gel of TWIK-1 and the corresponding autoradiograph. Samples were deglycosylated (PNGase F) and reduced as indicated. The non-deglycosylated sample is marked with an asterisk.

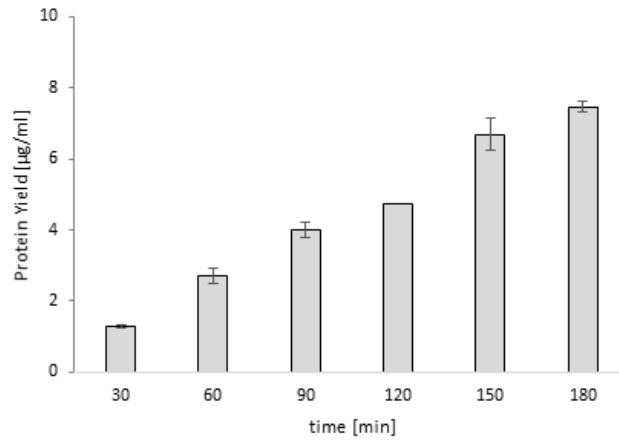

**Figure S5.** Cell-free coexpression of TWIK-1 and TREK-2: Proteins were coexpressed and labeled with  $^{14}\text{C}$ -leucine. Quantitative analysis of TWIK-1 and TREK-2 coexpression over time. Standard deviations were calculated from triplicates.

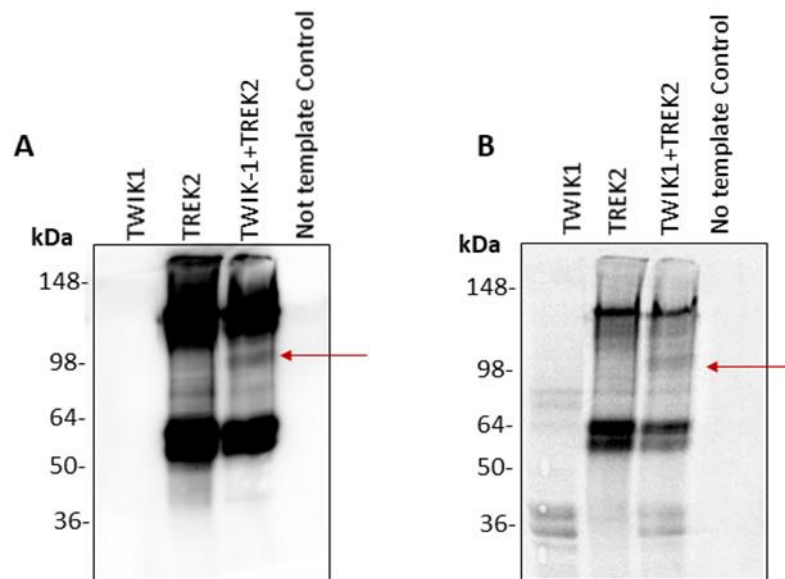

**Figure S6.** Immunodetection of TREK-2 and TWIK-1 coexpression (A) Western-Blot of coexpression. (B) Corresponding autoradiograph of western-blotting membrane.
